# Supplementary material for: Surface-enhanced Raman scattering spectra of adsorbates on Cu2O nanospheres: charge-transfer and electromagnetic enhancement
Source: Royal Society of Chemistry journal article supplement (doi:10.1039/c3nr33502j), 2013-01-01
Supplement: c3nr33502j.pdf [file c3nr33502j.pdf]

## Supporting Information

### Surface-Enhanced Raman Scattering Spectra of Adsorbates on Cu<sub>2</sub>O Nanospheres: Charge-Transfer and Electromagnetic Enhancement

Li Jiang,<sup>a</sup> Tingting You,<sup>a</sup> Penggang Yin,<sup>\*a</sup> Yang Shang,<sup>a</sup> Dongfeng Zhang,<sup>a</sup> Lin Guo<sup>\*a</sup> and Shihe Yang,<sup>\*a,b</sup>

<sup>a</sup> Key Laboratory of Bio-Inspired Smart Interfacial Science and Technology of Ministry of Education, School of Chemistry and Environment, Beihang University, Beijing 100191, China.

<sup>b</sup> Department of Chemistry, The Hong Kong University of Science and Technology, Clear Water Bay, Kowloon, Hong Kong, China.

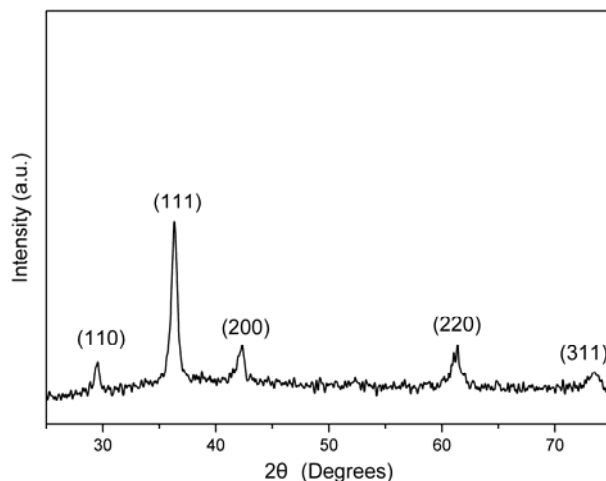

Fig. S1 XRD pattern of the as-synthesized Cu<sub>2</sub>O nanospheres.

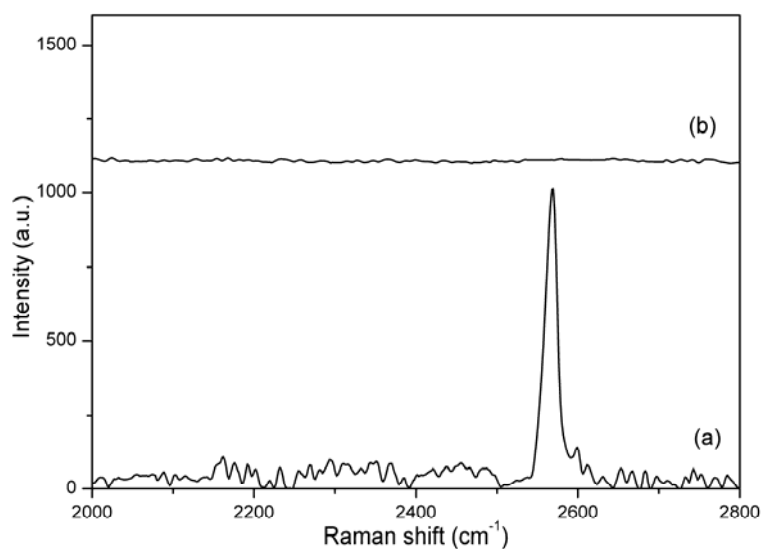

Fig. S2 (a) Raman spectra of 4-MBA powder with SH stretching mode at 2570 cm<sup>-1</sup>, (b) 4-MBA adsorbed onto Cu<sub>2</sub>O, the above mode disappeared.

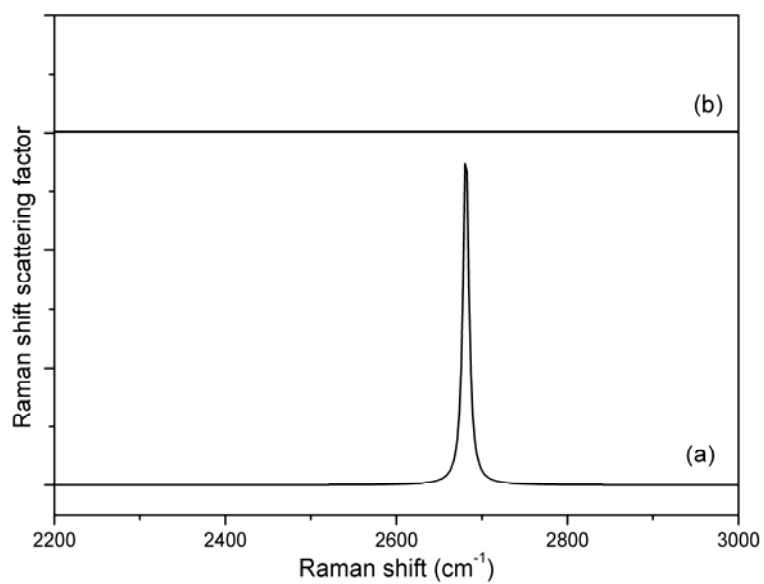

**Fig. S3** Simulated results of (a) Raman spectra of pure 4-MBA with SH stretching mode at 2681 cm<sup>-1</sup>, (b) 4-MBA adsorbed onto Cu<sub>2</sub>O.

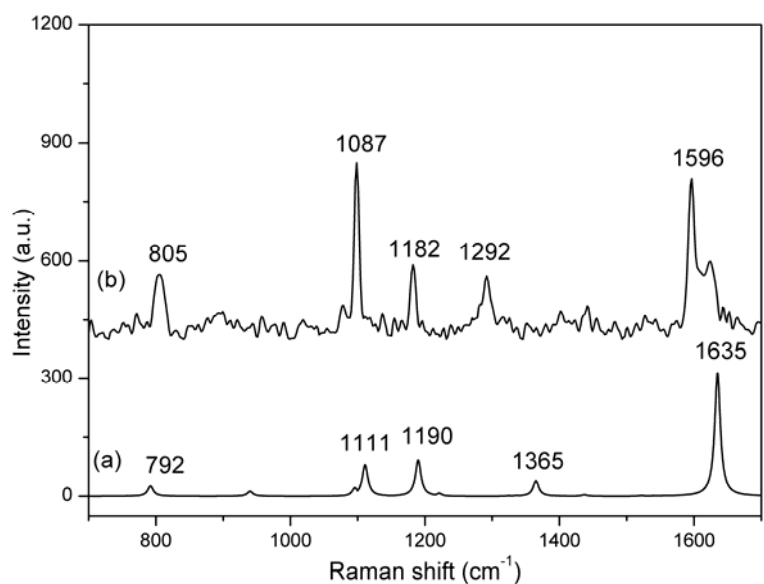

**Fig. S4** calculated (a) and measured (b) normal Raman spectrum of the solid 4-MBA.

Table S1 Assignments of vibrations of solid 4-MBA and 4-MBA molecules adsorbed onto Cu<sub>2</sub>O surfaces.

| Cal solid | Exp solid | Cal sers | Exp sers | assignment                      |
|-----------|-----------|----------|----------|---------------------------------|
| 792       | 805       | 791      | 851      | $\gamma_{CCC}$                  |
| 1111      | 1087      | 1089     | 1084     | <i>ring-breath</i> + $\nu_{CS}$ |
| 1190      | 1182      | 1189     | 1184     | $\delta_{CH}$                   |
|           | 1292      | 1216     |          | $\delta_{CH}$                   |
| 1365      |           | 1363     | 1410     | $\gamma_{COH}$                  |
|           |           | 1516     | 1489     | $\delta_{CH-as}$                |
| 1635      | 1596      | 1630     | 1586     | $\nu_{CC-ring}$                 |
